# Supplementary material for: Analysis of 100,000 human cancer genomes reveals the landscape of tumor mutational burden
Source: PubMed Central journal article supplement (PMC5395719; doi:10.1186/s13073-017-0424-2), 2017-04-19

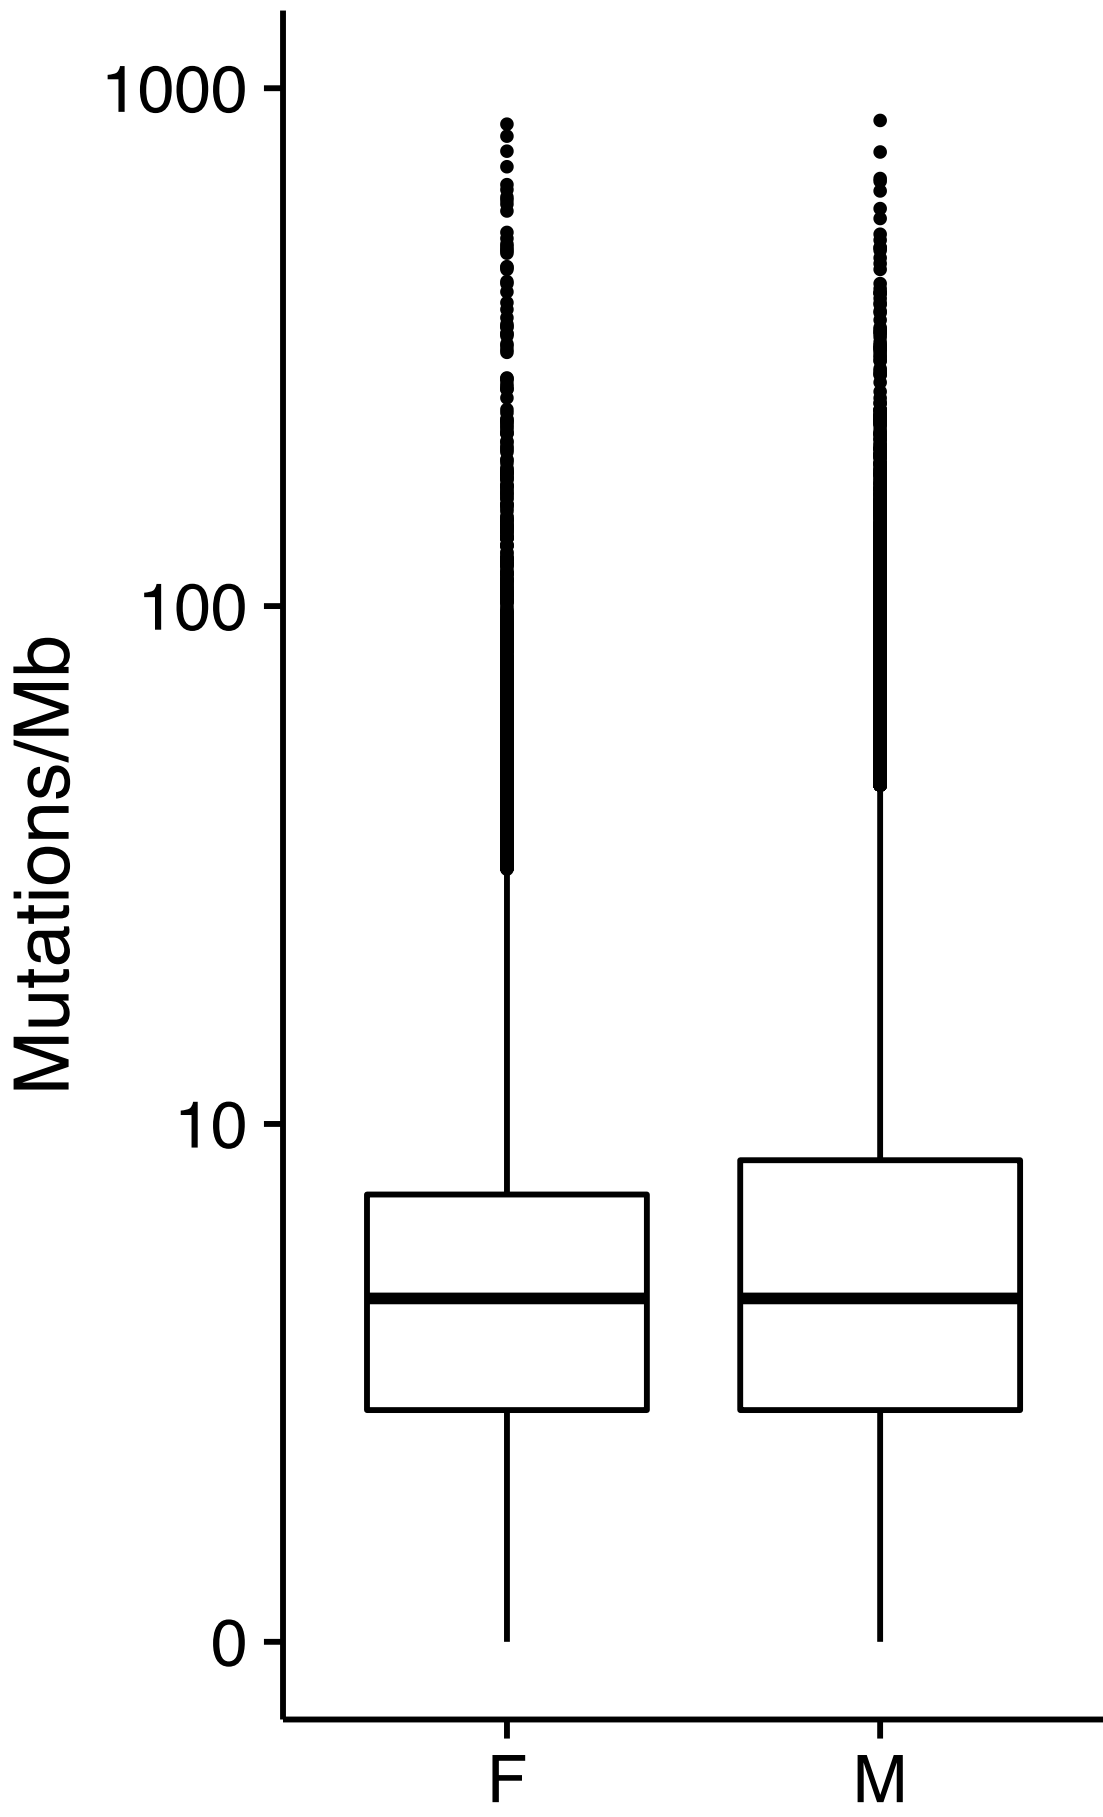

Supplement: 13073_2017_424_MOESM2_ESM.pdf [file 13073_2017_424_MOESM2_ESM.pdf]
